# Supplementary material
Source: PubMed Central journal article supplement (PMC10124158)

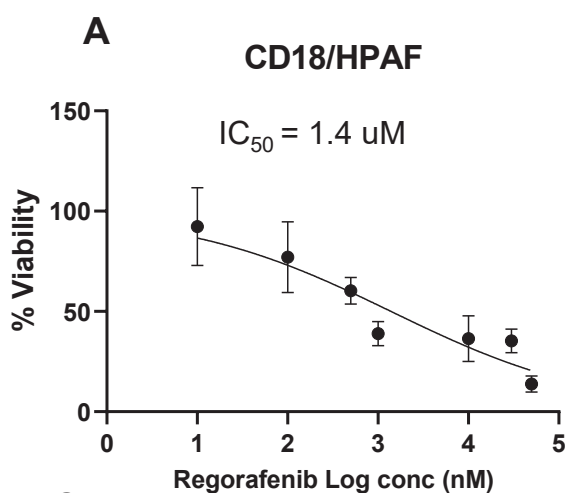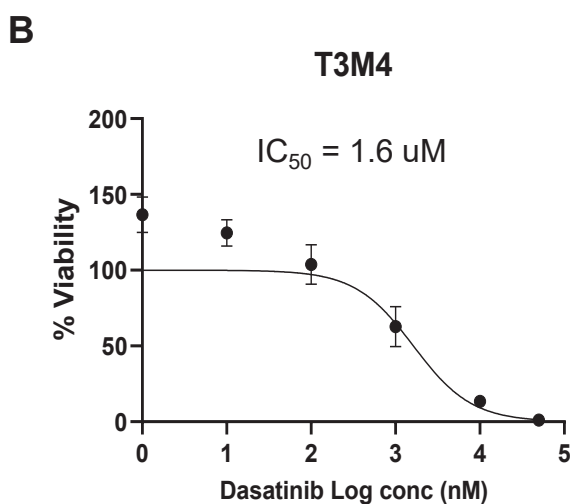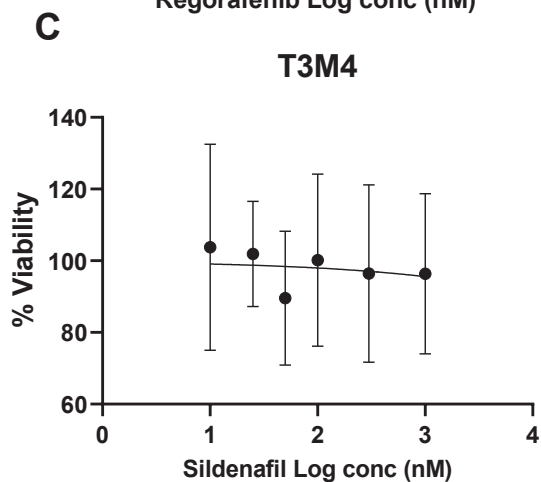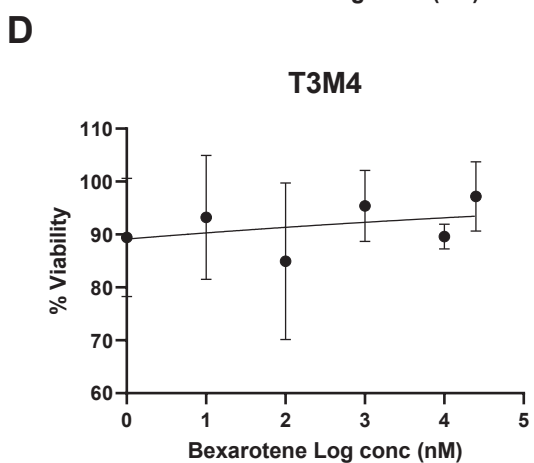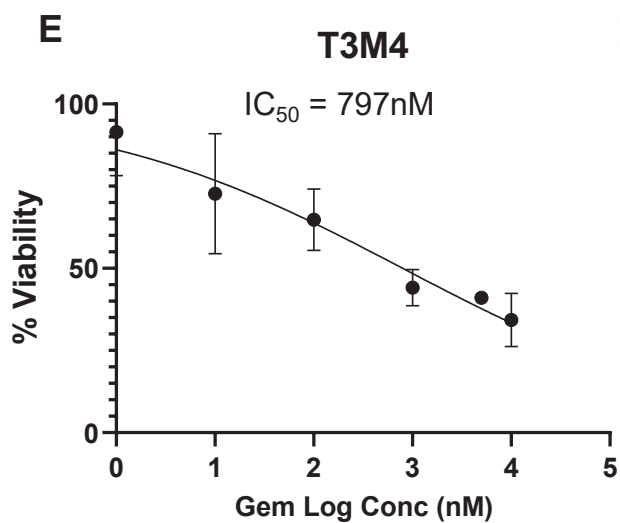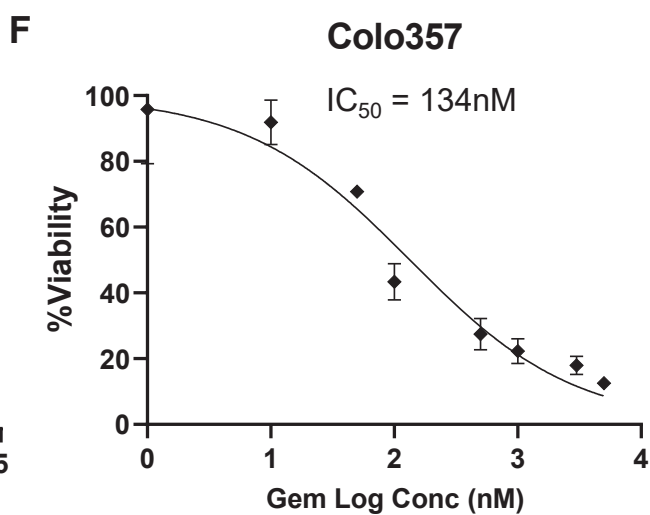

Supplement: NIHMS1880651-supplement-Supplementary_Fig__1.pdf [file NIHMS1880651-supplement-Supplementary_Fig__1.pdf]

Supplementary Figure S10

**A**

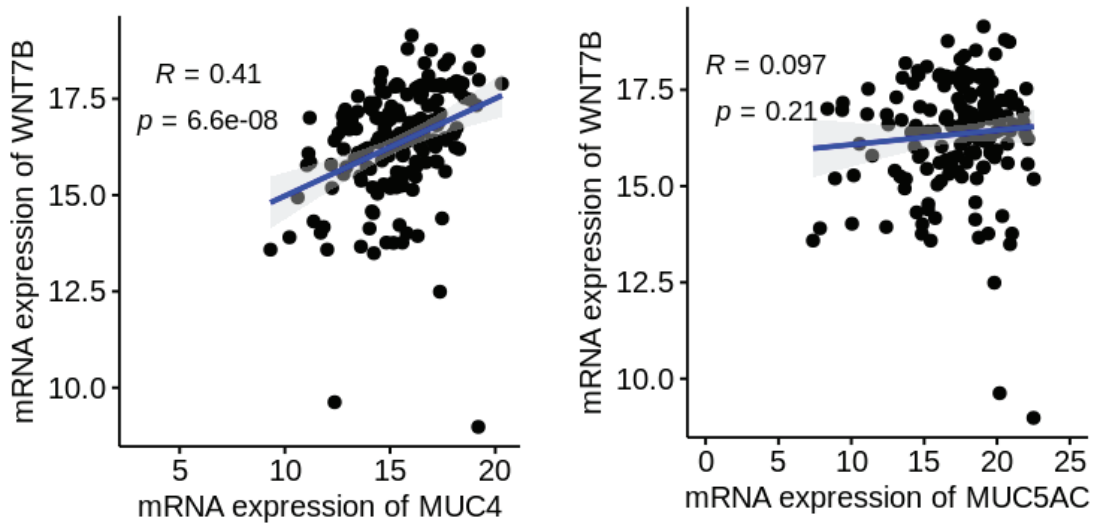

**B**

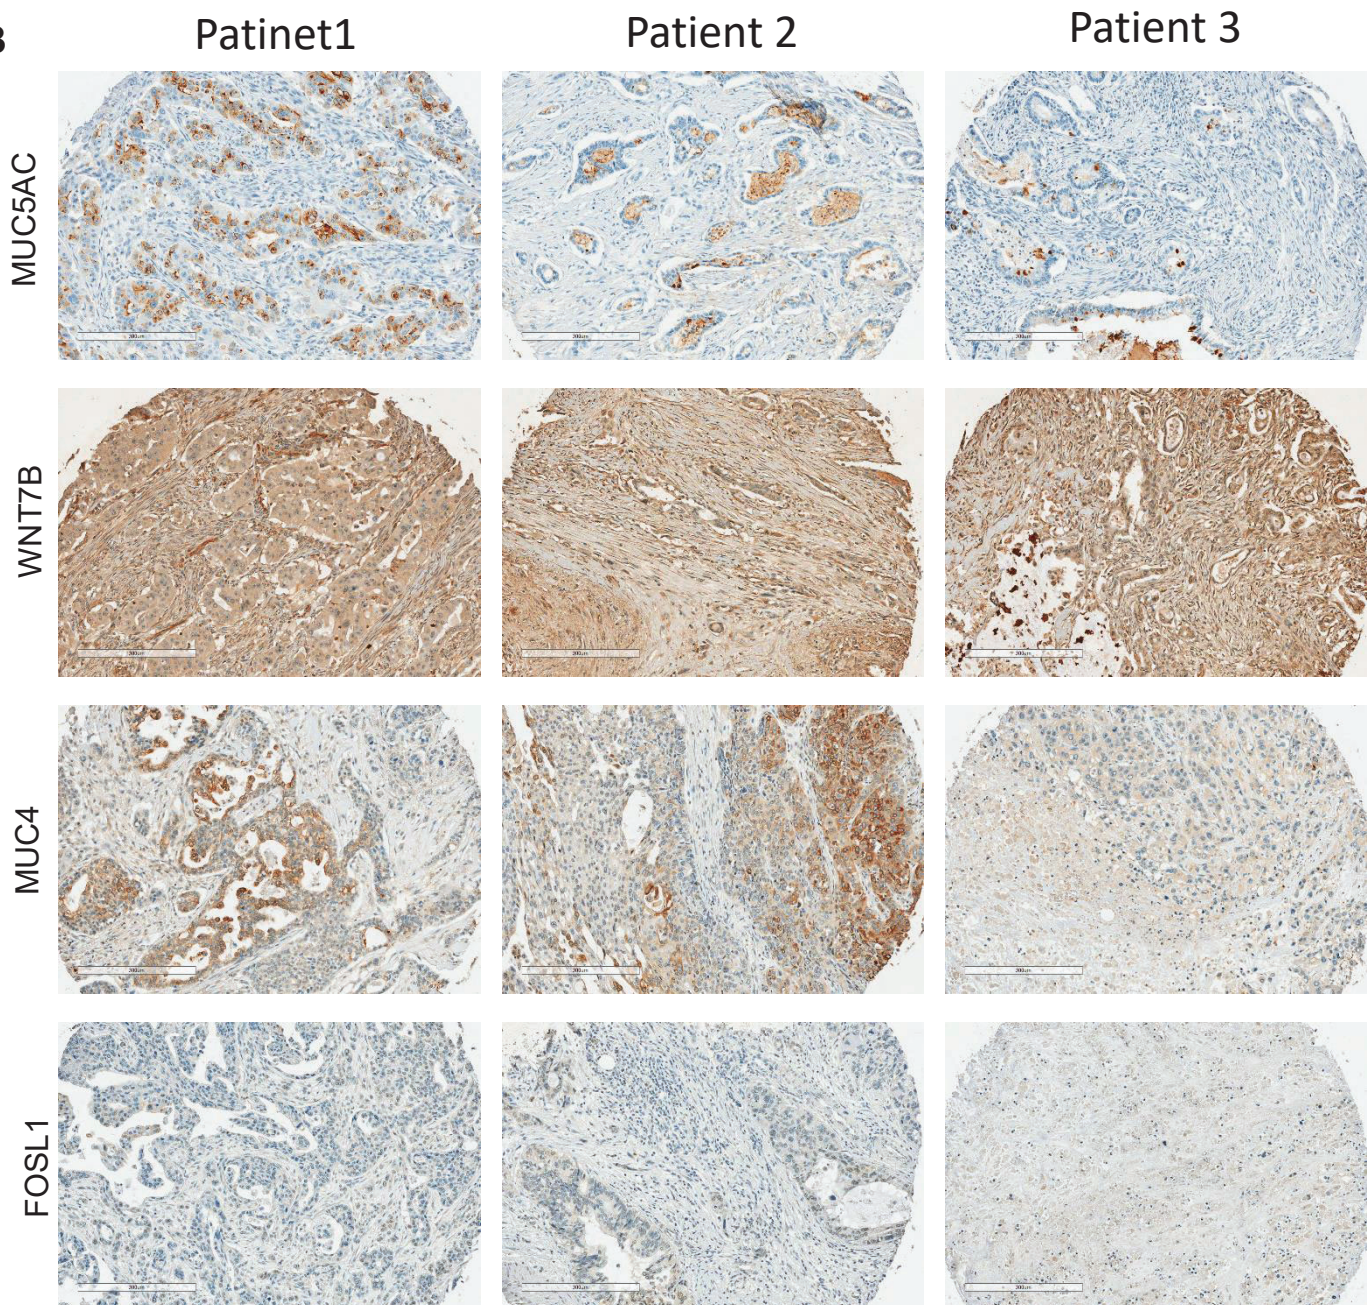

Supplement: NIHMS1880651-supplement-Supplementary_Fig__10.pdf [file NIHMS1880651-supplement-Supplementary_Fig__10.pdf]

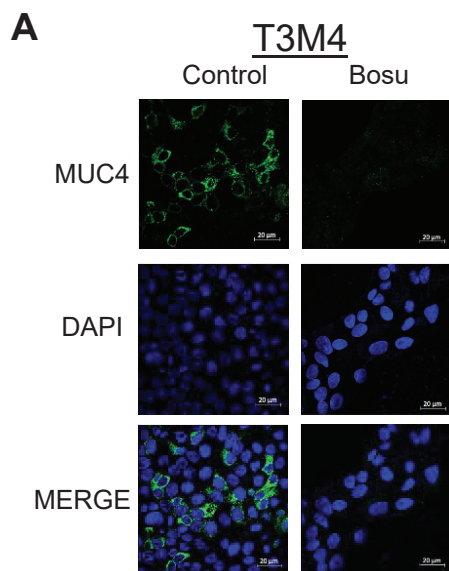

**B**

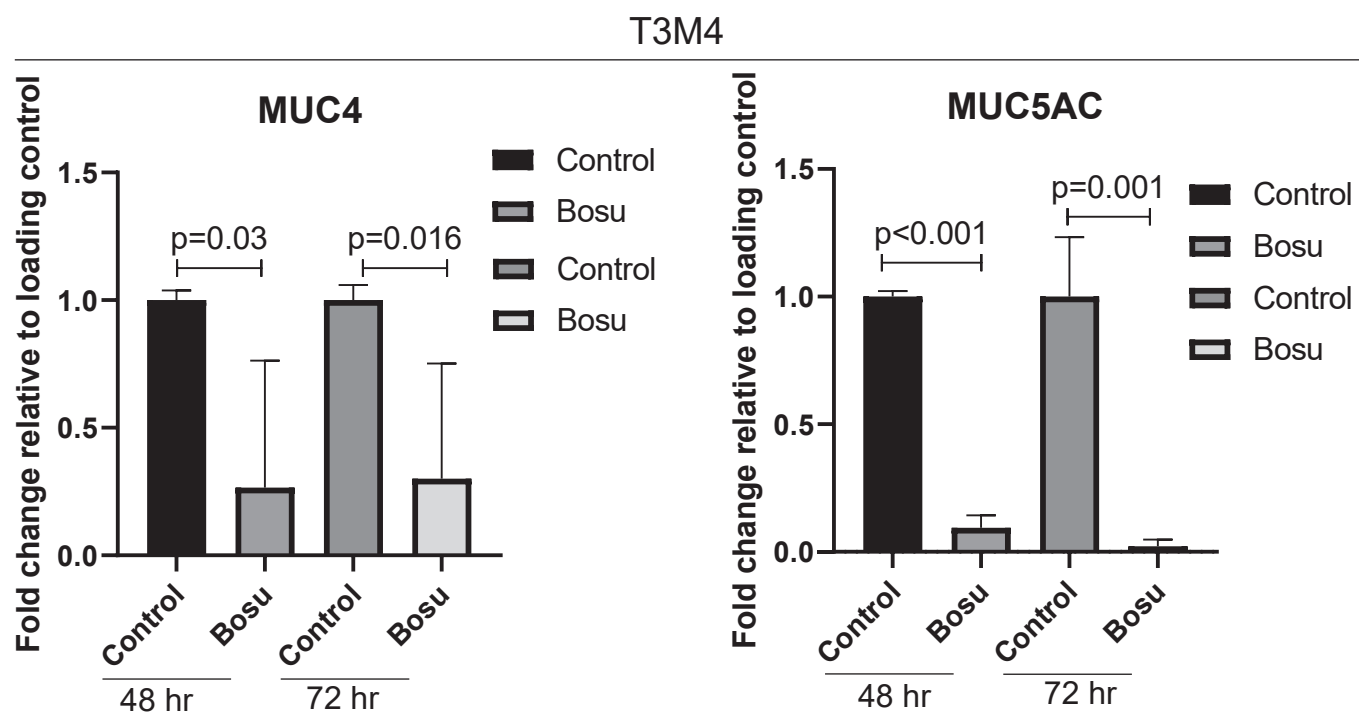

Supplement: NIHMS1880651-supplement-Supplementary_Fig__2.pdf [file NIHMS1880651-supplement-Supplementary_Fig__2.pdf]

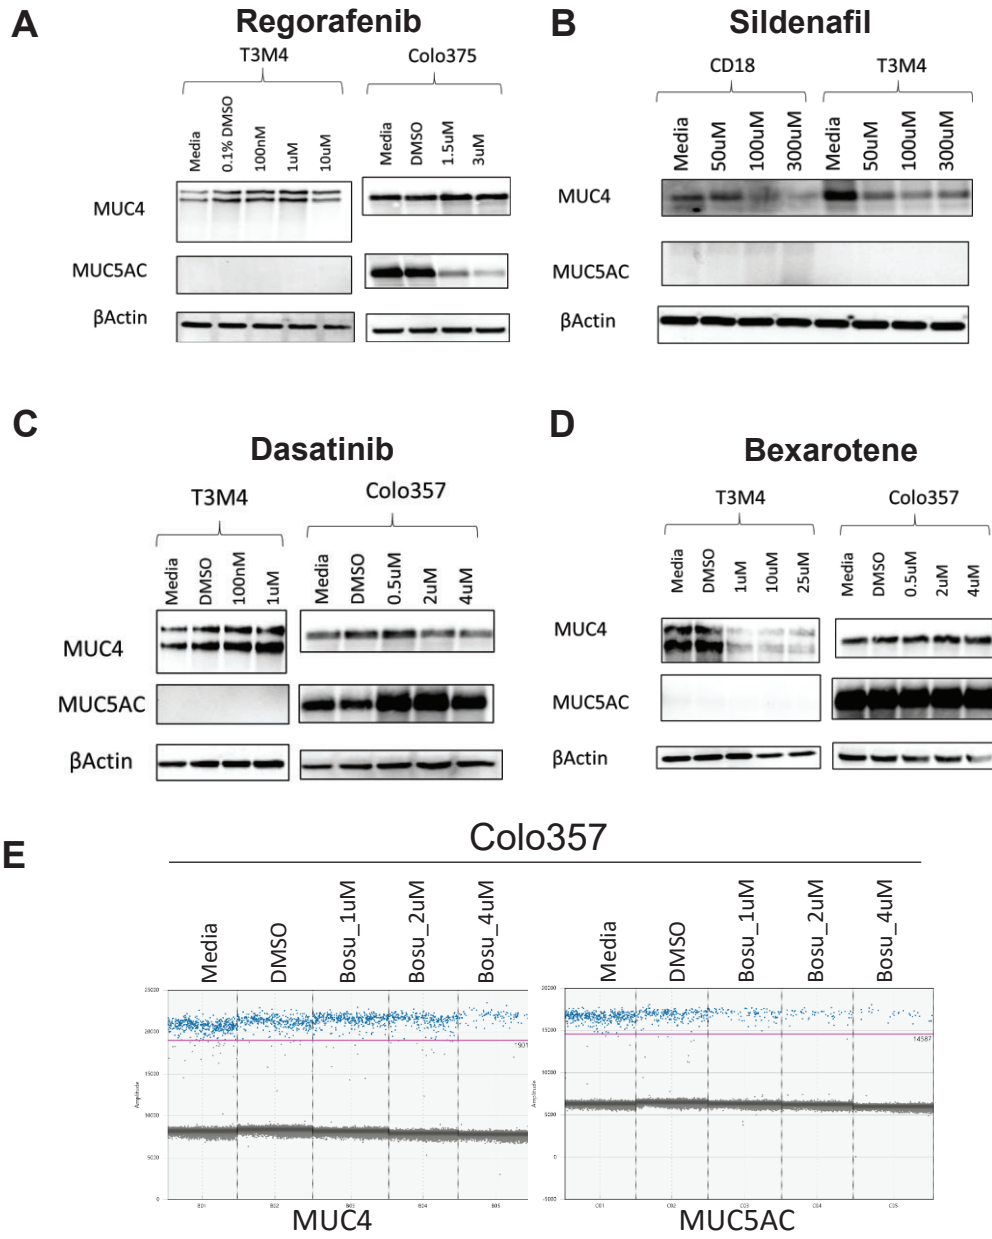

Supplement: NIHMS1880651-supplement-Supplementary_Fig__3.pdf [file NIHMS1880651-supplement-Supplementary_Fig__3.pdf]

Supplementary Figure S4

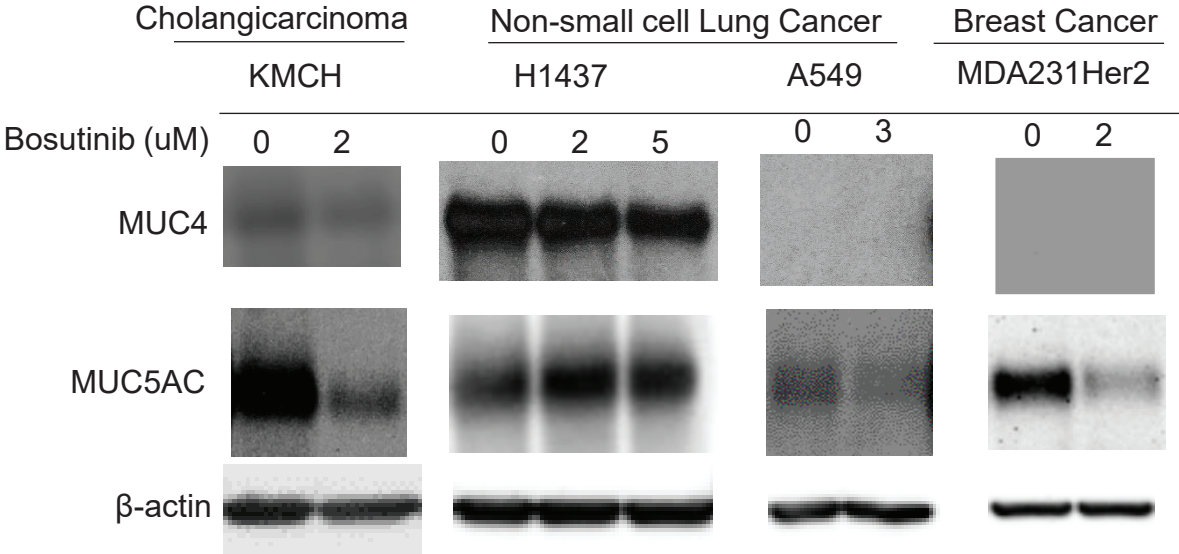

Supplement: NIHMS1880651-supplement-Supplementary_Fig__4.pdf [file NIHMS1880651-supplement-Supplementary_Fig__4.pdf]

Supplementary Figure S5

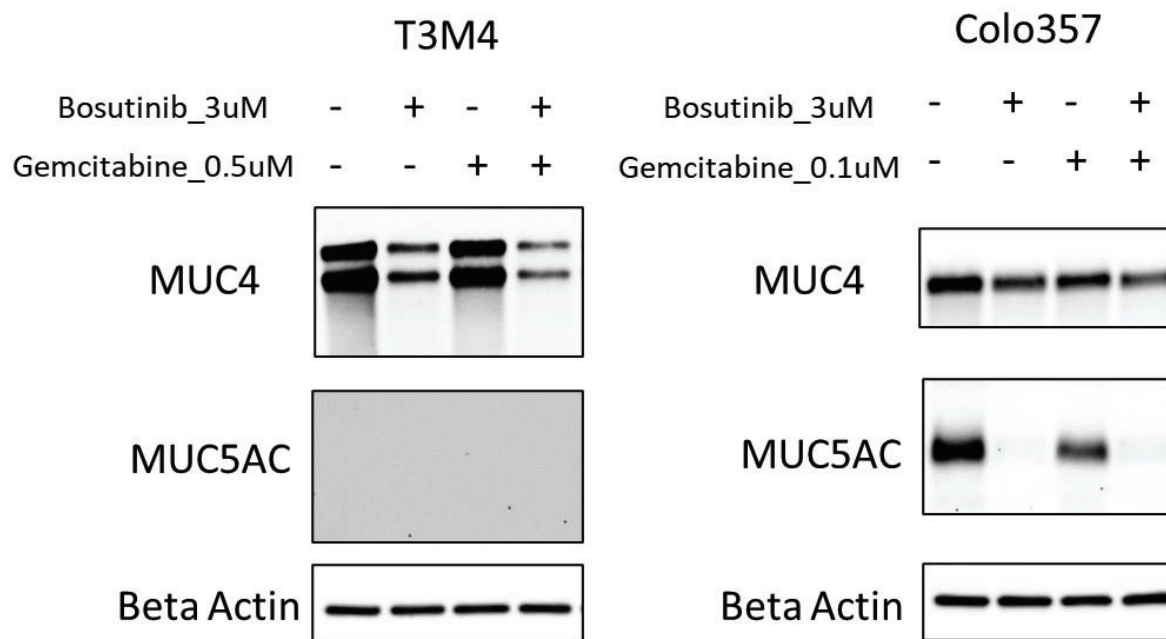

Supplement: NIHMS1880651-supplement-Supplementary_Fig__5.pdf [file NIHMS1880651-supplement-Supplementary_Fig__5.pdf]

Supplementary Figure S6

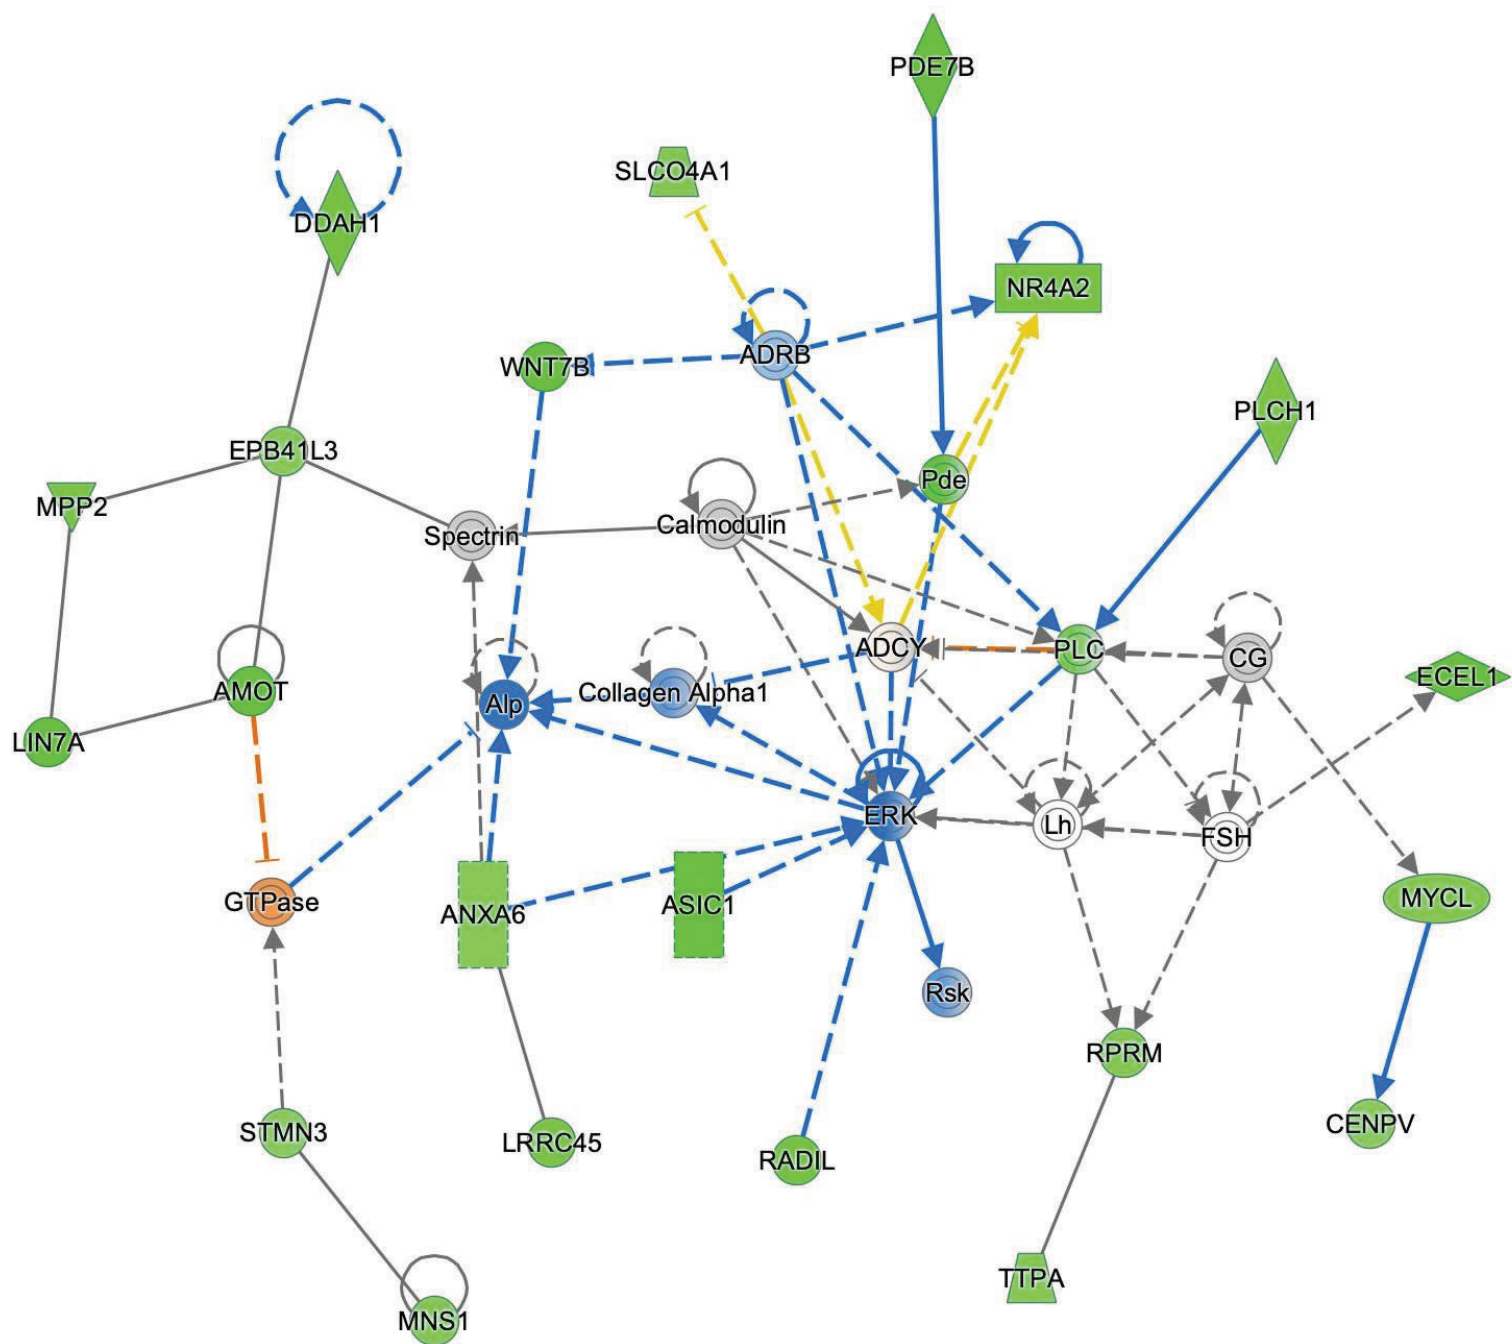

Supplement: NIHMS1880651-supplement-Supplementary_Fig__6.pdf [file NIHMS1880651-supplement-Supplementary_Fig__6.pdf]

Supplementary Figure S7

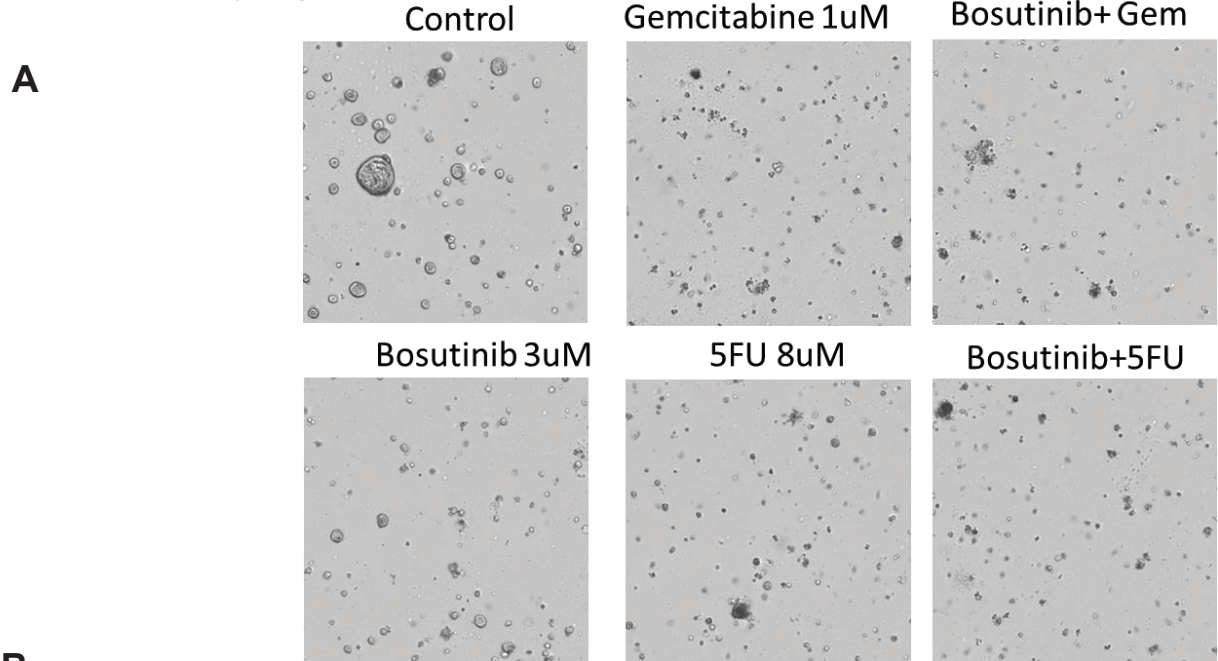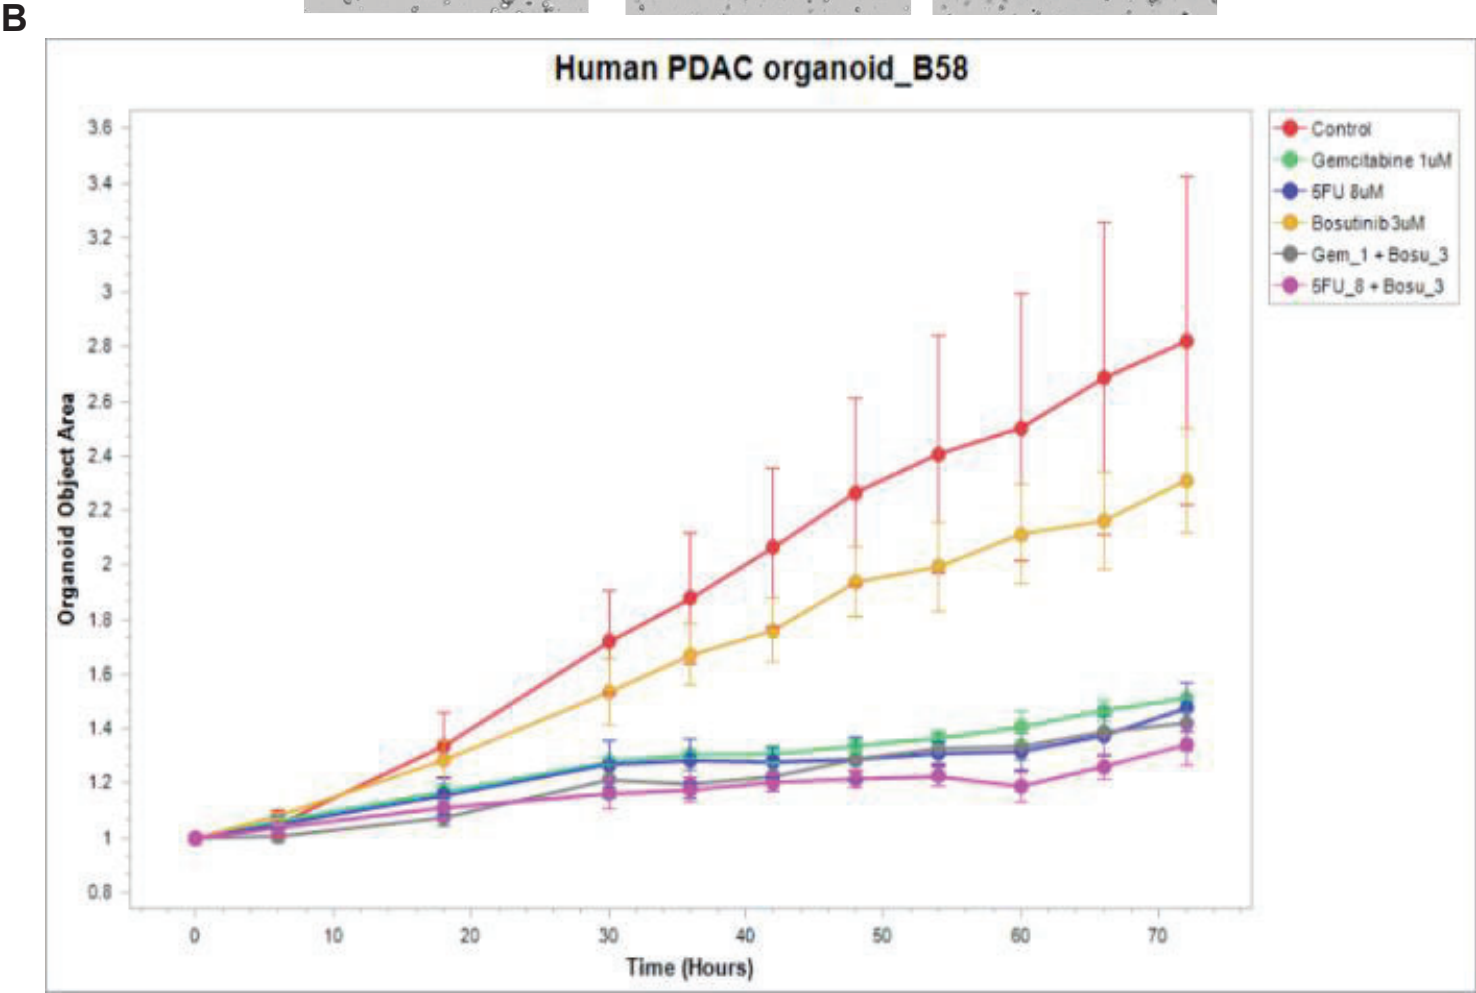

Supplement: NIHMS1880651-supplement-Supplementary_Fig__7.pdf [file NIHMS1880651-supplement-Supplementary_Fig__7.pdf]

Supplementary Figure S8

**A**

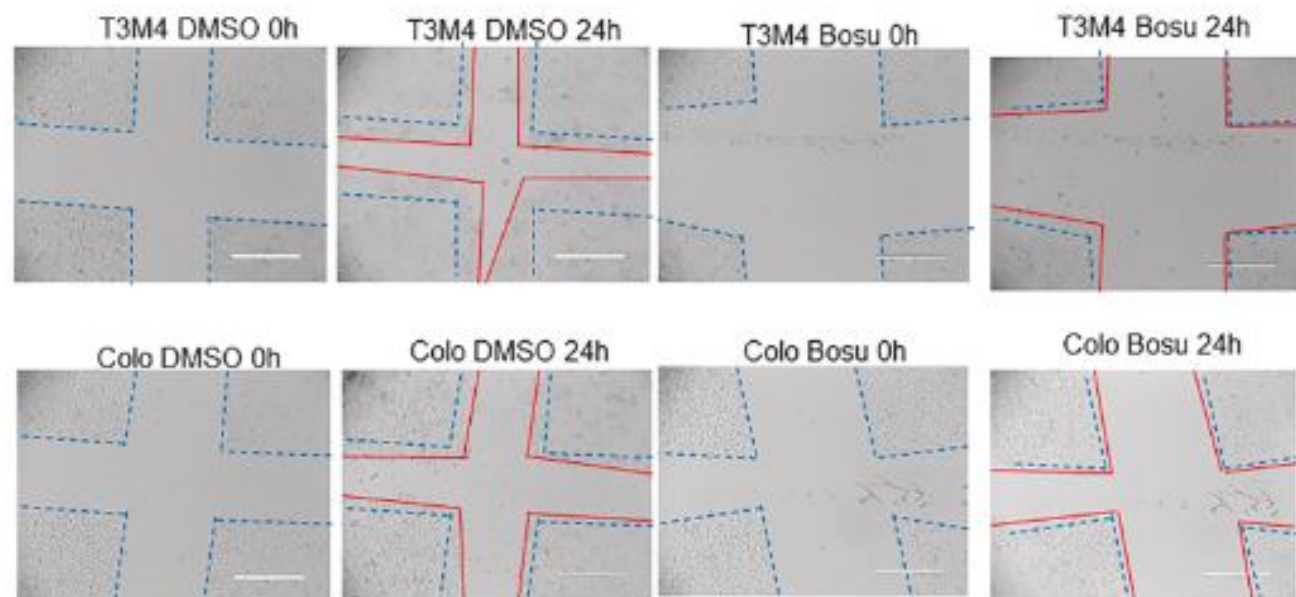

**B**

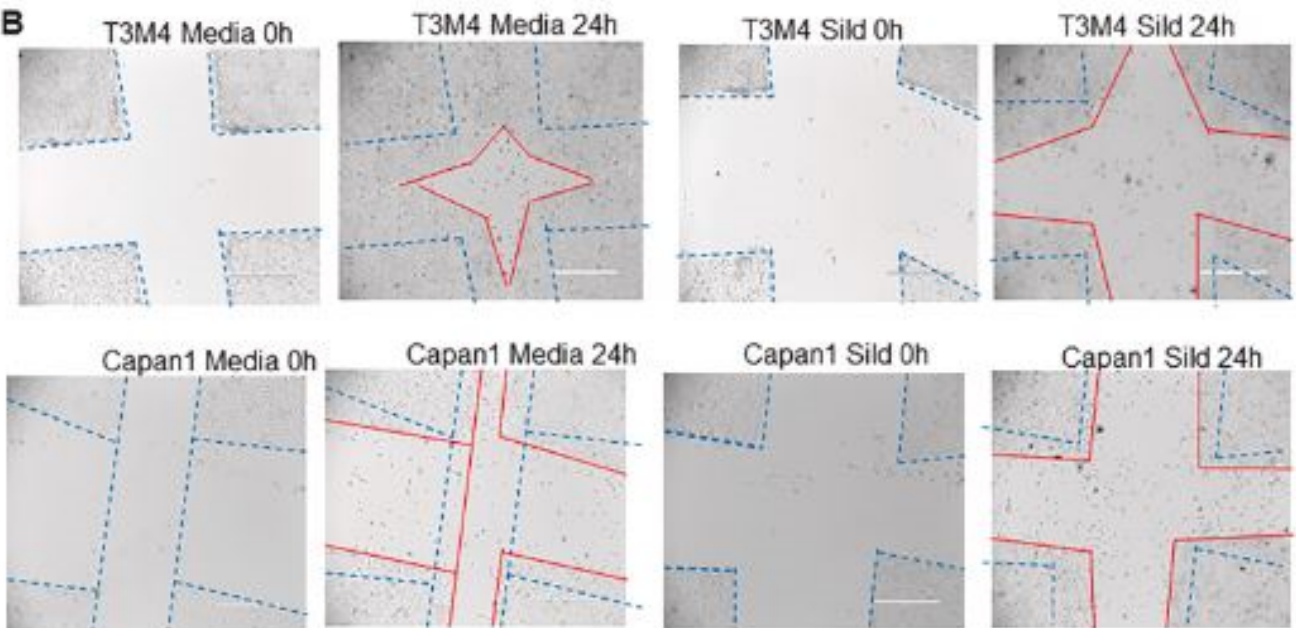

Supplement: NIHMS1880651-supplement-Supplementary_Fig__8.pdf [file NIHMS1880651-supplement-Supplementary_Fig__8.pdf]

Supplementary Figure S9

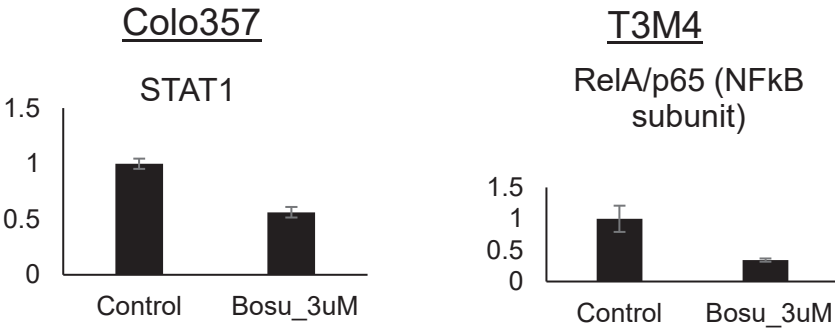

Supplement: NIHMS1880651-supplement-Supplementary_Fig__9.pdf [file NIHMS1880651-supplement-Supplementary_Fig__9.pdf]
